# Supplementary material
Source: PubMed Central journal article supplement (PMC6474841)

# Neutrophil Activation Occurs at Exposed Debris

- Click on model and hold to freely rotate.
- Mac: Hold <option> + <command> keys  
Windows: Hold <Alt> key } then use scroll function of your mouse to zoom in or out.
- Click on "Model tree" to hide or isolate parts, or make parts transparent.
- See next page for further instructions.

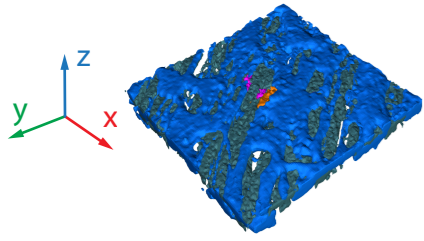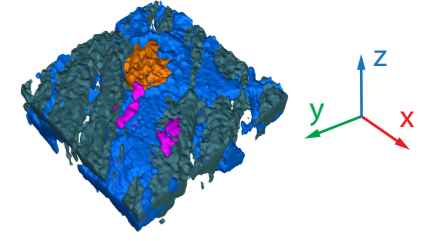

A

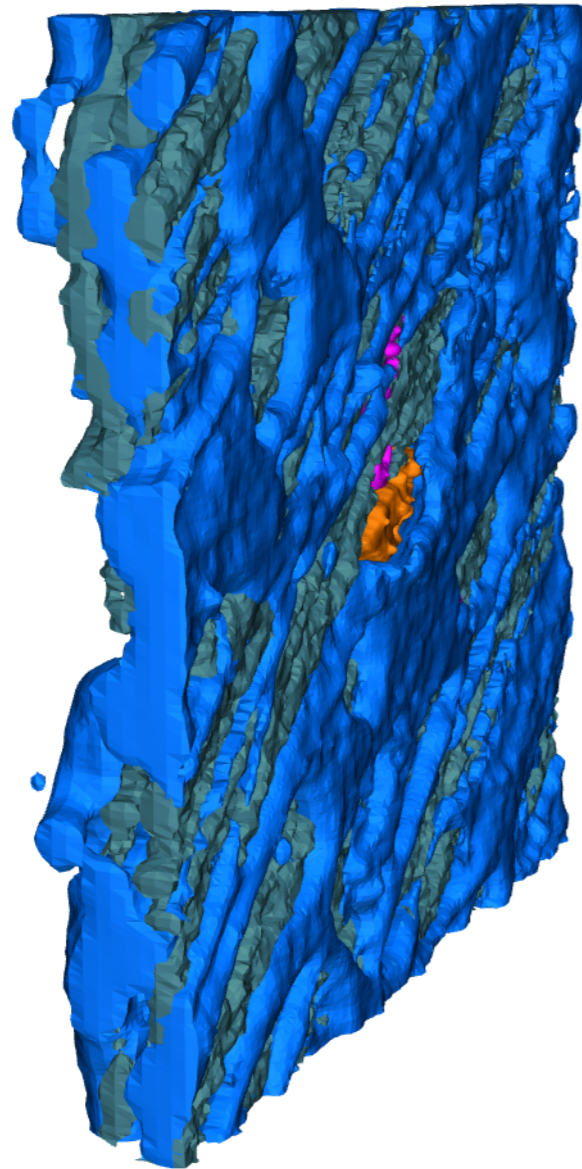

Neutrophil    Stromal cells  
Collagen    Stromal microlesion

B

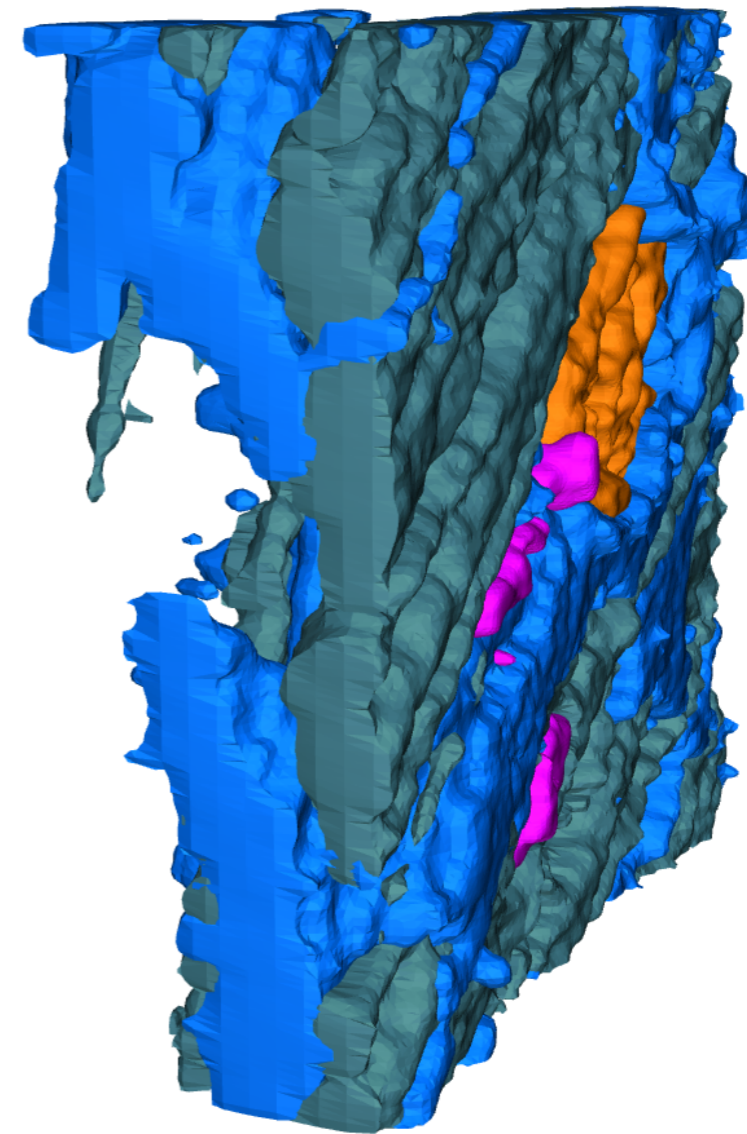

Neutrophil    Stromal cells  
Collagen    Stromal microlesion

# Instructions to view and interact with 3D model

- Open pdf-file with Adobe Acrobat Reader (Right click on file > Open with...)
- Get Acrobat Reader: <https://get.adobe.com/reader/>

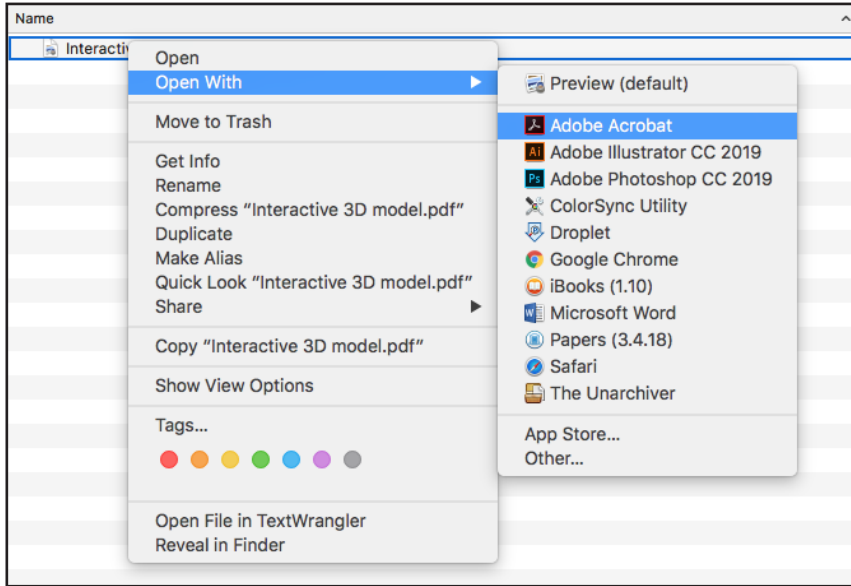

- Click on model to activate animation
- If necessary: Click "Trust this document"

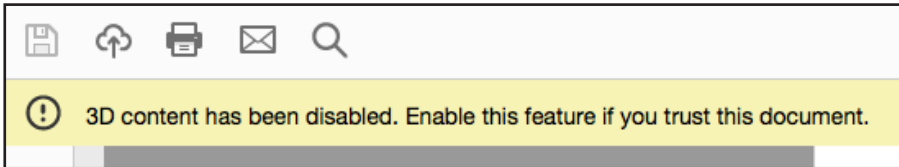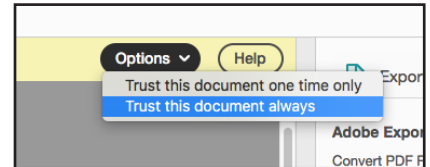

- If 3D model is not showing: Preferences > 3D & Multimedia > Enable playing of 3D content
- Further help: <https://helpx.adobe.com/acrobat/using/displaying-3d-models-pdfs.html>

- Click on model and hold to freely rotate
- Mac: Hold <option> + <command> keys  
Windows: Hold <Alt> key — then use scroll function of your to zoom in or out
- Click on "Model tree" to hide or isolate parts, or make parts transparent

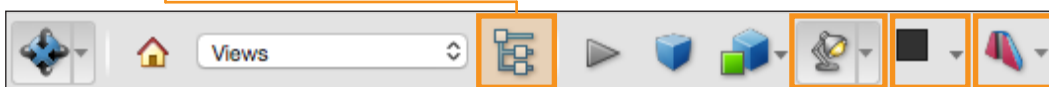

- Slice through the model
- Change background color
- Change lighting effects

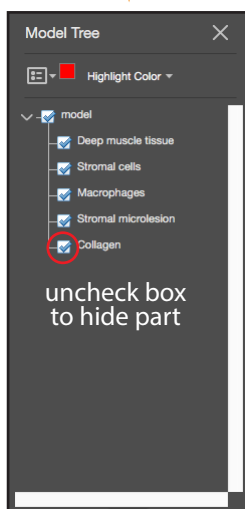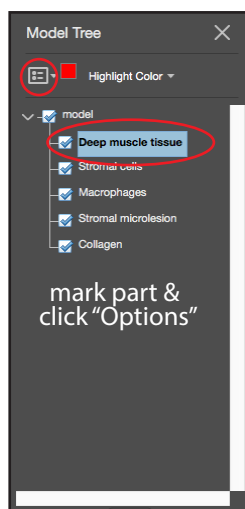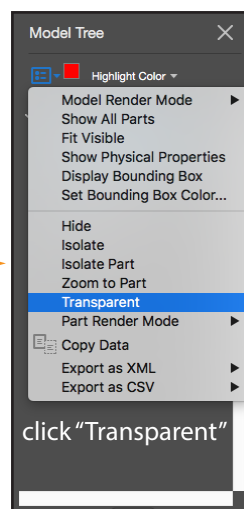

Supplement: NIHMS1017759-supplement-Data_File_S1.pdf [file NIHMS1017759-supplement-Data_File_S1.pdf]
